# Supplementary figures and images for: Resistive switching effects depending on Ni content in Au/NixPt(1−x) nanoparticle devices
Source: Royal Society of Chemistry journal article supplement (doi:10.1039/c6ra24987f), 2017-01-01

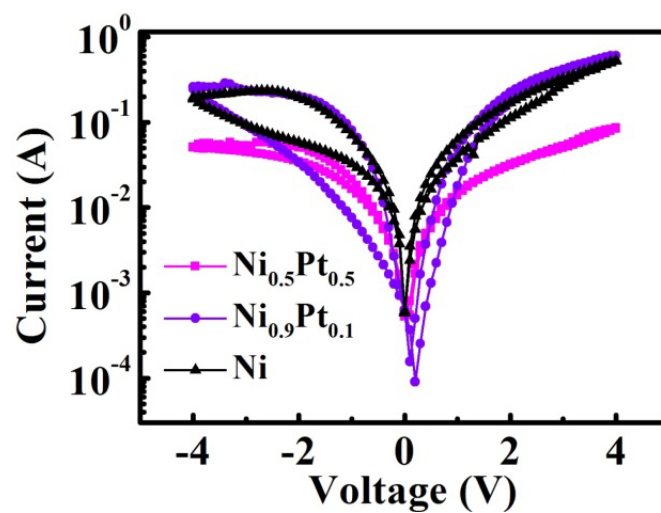

**Fig. S1** I-V characteristics of Au/ $\text{Ni}_x\text{Pt}_{(1-x)}$  NPs/NSTO/In devices.

Supplement: c6ra24987f1.pdf [file c6ra24987f1.pdf]
